# Supplementary material for: CD1a promotes systemic manifestations of skin inflammation
Source: Springer Nature journal article supplement (doi:10.1038/s41467-022-35071-1), 2022-12-07
Supplement: MOESM1 [file 41467_2022_35071_MOESM1_ESM.pdf]

## **Supplementary Information**

### **CD1a promotes systemic manifestations of skin inflammation**

Clare S. Hardman<sup>1</sup>, Yi-Ling Chen<sup>1</sup>, Marcin Wegrecki<sup>2</sup>, Soo Weei Ng<sup>1</sup>, Robert Murren<sup>3</sup>, Davinderpreet Mangat<sup>3</sup>, John-Paul Silva<sup>3</sup>, Rebecca Munro<sup>3</sup>, Win Yan Chan<sup>3</sup>, Victoria O'Dowd<sup>3</sup>, Carl Doyle<sup>3</sup>, Prashant Mori<sup>3</sup>, Andy Popplewell<sup>3</sup>, Jamie Rossjohn<sup>2,4</sup>, Daniel Lightwood<sup>3</sup>, Graham S. Ogg<sup>1</sup>

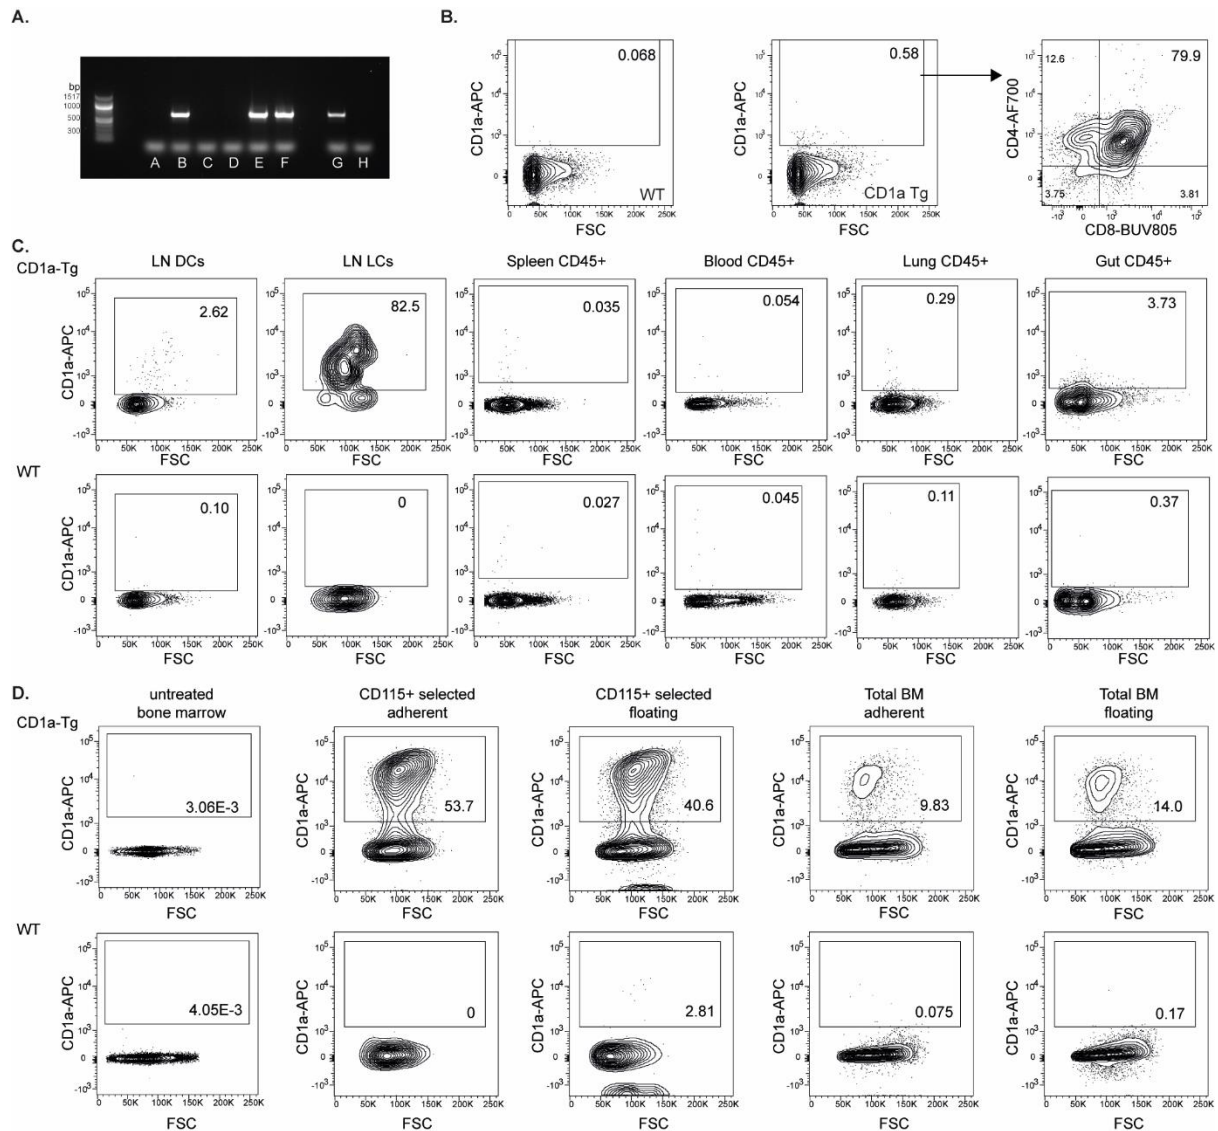

**Supplementary Figure 1. Characterisation of CD1a transgenic mouse.** **A.** Exemplar PCR genotyping of CD1a transgenic mouse line litter (lanes A-F) using CD1a forward and reverse primers and tail genomic DNA. Expected CD1a band at 655 base pairs (bp). Lane G: positive control genomic DNA from founder mouse. Lane H: negative control lacking DNA template. Data shown representative of 10 independent experiments, genotype examined once per mouse. **B** Representative flow cytometry plots of thymic CD1a protein expression by wild-type (WT) and CD1a transgenic (CD1a) mice. **C.** Steady state CD1a expression was assessed on cells derived from unchallenged naïve mice by flow cytometry. From left to right, CD1a expression was assessed upon: skin draining lymph node dendritic cells (DC, CD11c+), lymph node Langerhans cells (LC, CD11c+, Langerin+), CD45+ spleen cells, CD45+ blood cells, CD45+ lung cells and CD45+ gut tissue derived cells. **D.** Representative flow cytometry plots of bone marrow-derived cellular CD1a protein expression by wild-type (WT, lower panels) and CD1a transgenic (CD1a, upper panels) mice. Bone marrow was collected from mice and subjected, or not, to CD115+ monocyte enrichment. Enriched and total bone marrow cells were cultured with rmGM-CSF (20ng/ml) for 7 days and CD1a expression assessed by flow cytometry of adherent and floating bone marrow derived cells. CD1a expression by untreated bone marrow was assessed directly following collection and processing.

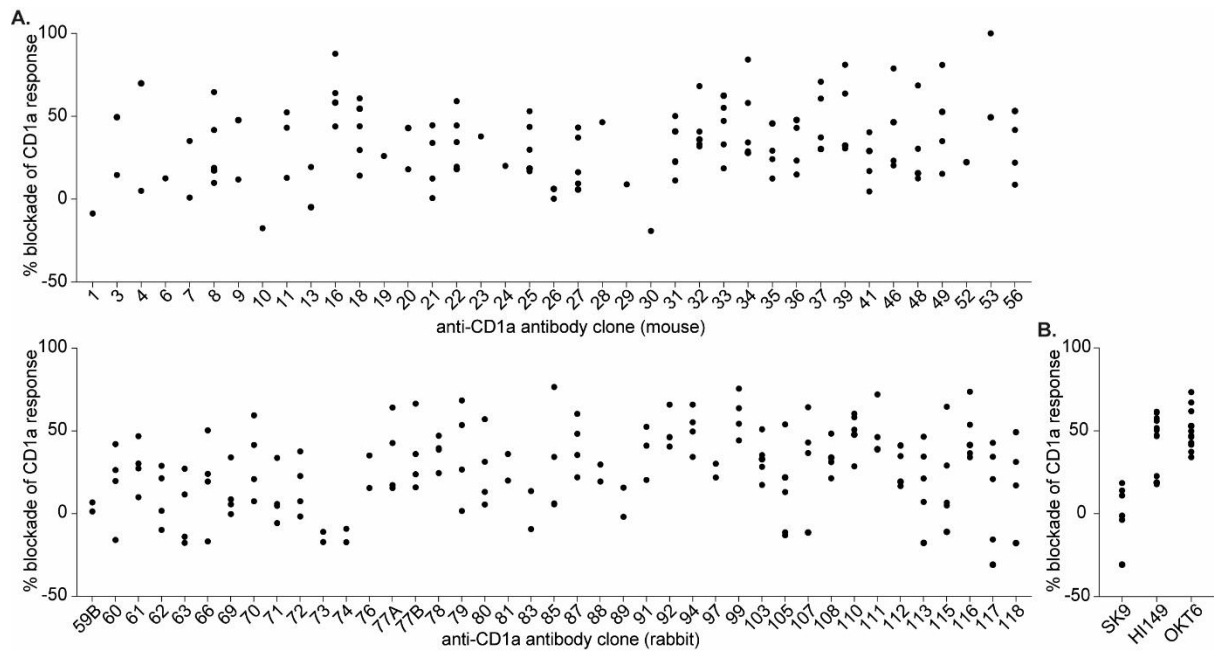

**Supplementary Figure 2. Characterisation of anti-CD1a antibodies in the inhibition of polyclonal T cell responses. A-B.** Determination of the capacity for a large panel of purified anti-CD1a antibodies to inhibit the CD1a dependent activation of polyclonal T cell IFN $\gamma$  production. T cells were isolated from donor PBMCs by CD3 microbead separation. T cells were cocultured overnight with CD1a-K562 or EV-K562 and IFN $\gamma$  production was detected by ELISpot in the presence of 10  $\mu$ g / ml newly generated (A.) or commercially available (B.) anti-CD1a antibodies. % blockade was calculated upon comparison of the antibody treated and untreated groups following subtraction of the EV background level of cytokine spots. A-B. n represents biologically independent blood donors examined over 6 independent experiments. A. n=1 (1,6,10,19,23,24,28,29,30,52,53), n=2 (3,4,7,9,13,20,26,59B,73,74,76,81,83,88,89,97), n=3 (11,56) n=4 (16,21,36,37,39,41,46,49,60,61,62,63,66,69,70,71,72,77A,77B,78,79,80,85,87,91,92,94,99,107) n=5 (8,18,22,25,27,31,32,33,34,103,105,108,110,111,112,113,115,116,117,118). B. n=11 (HI149, OKT6) and n=7 (SK9). Source Data are provided as a Source Data file.

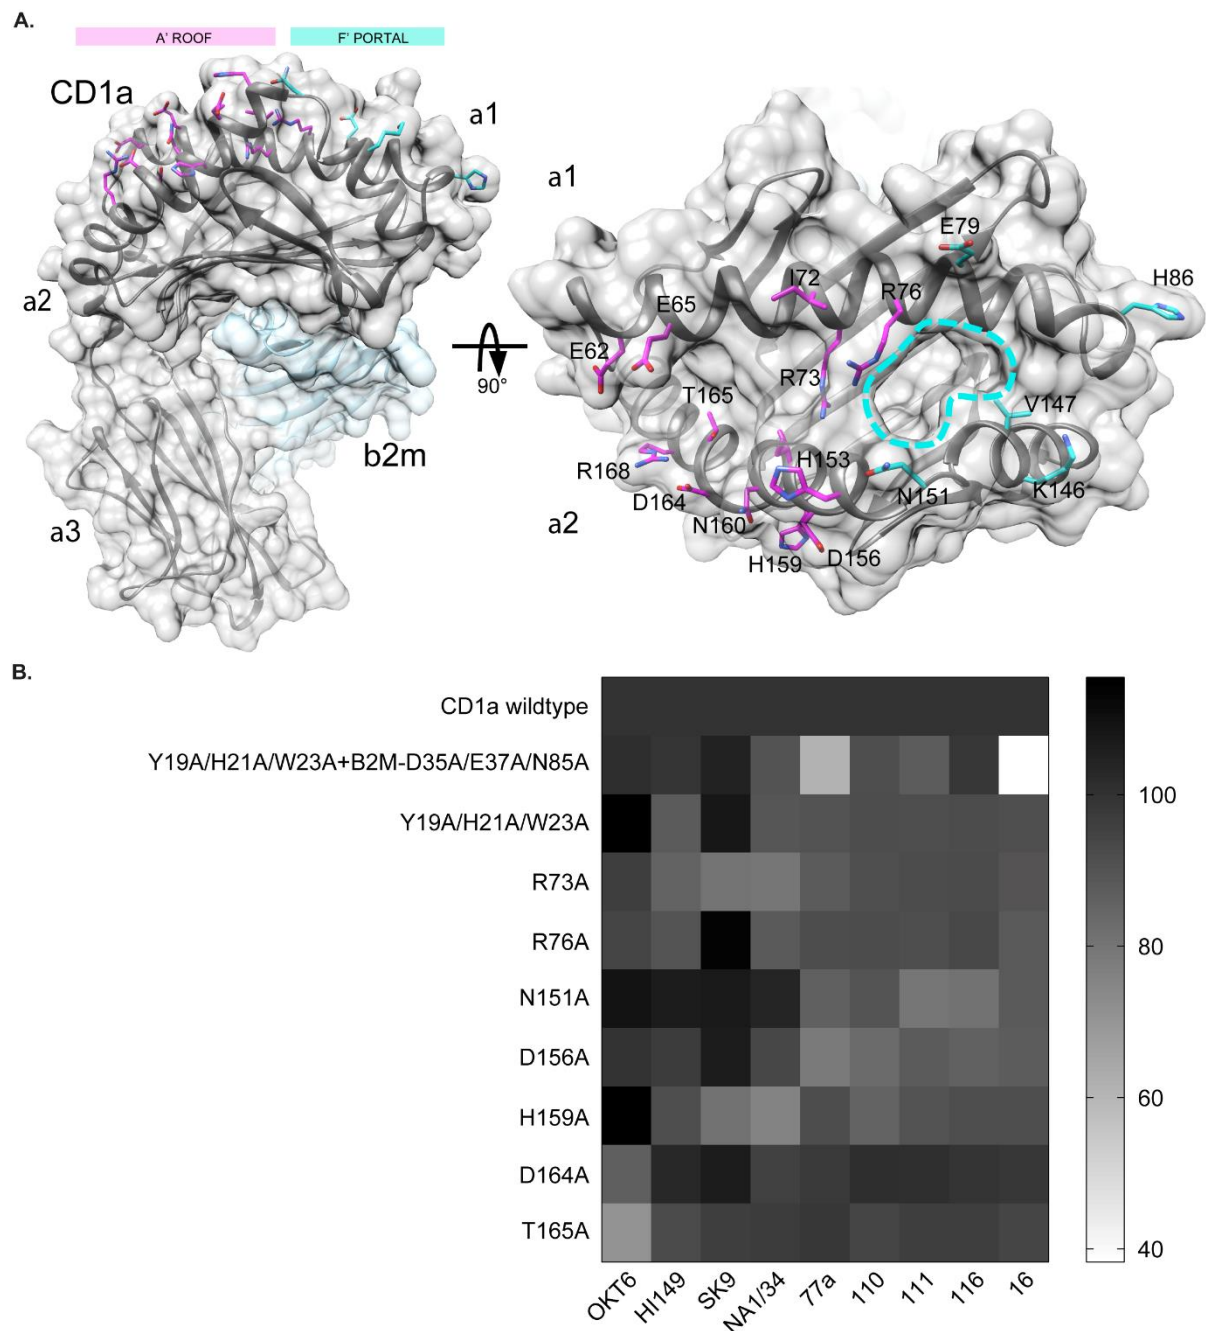

**Supplementary Figure 3. CD1a antibody epitope mapping.** **A.** Location of the mutated residues in the context of CD1a (grey) and  $\beta$ 2m (blue) heterodimer that were used in Ab epitope mapping experiments. Corresponding  $\alpha$  domains of CD1a are labelled. Side chains of the residues mutated to alanine are shown in colour and labelled in the right panel. Residues within the A' roof of CD1a are shown in magenta and those adjacent to the F' portal in cyan. The contour of the F' portal is marked with a cyan dashed line. **B.** Matrix heatmap representation of CD1a antibody binding to CD1a mutant proteins as represented by normalised CD1a-AF647 mean fluorescence intensity (MFI). Biotinylated CD1a mutant proteins and major and minor allele CD1a proteins were conjugated to streptavidin magnetic beads and binding of the panel of AF647-conjugated anti-CD1a antibodies was determined by flow cytometry. Grayscale shows degree of binding as a percentage of parent CD1a minor allele. Examined over 4 independent experiments.

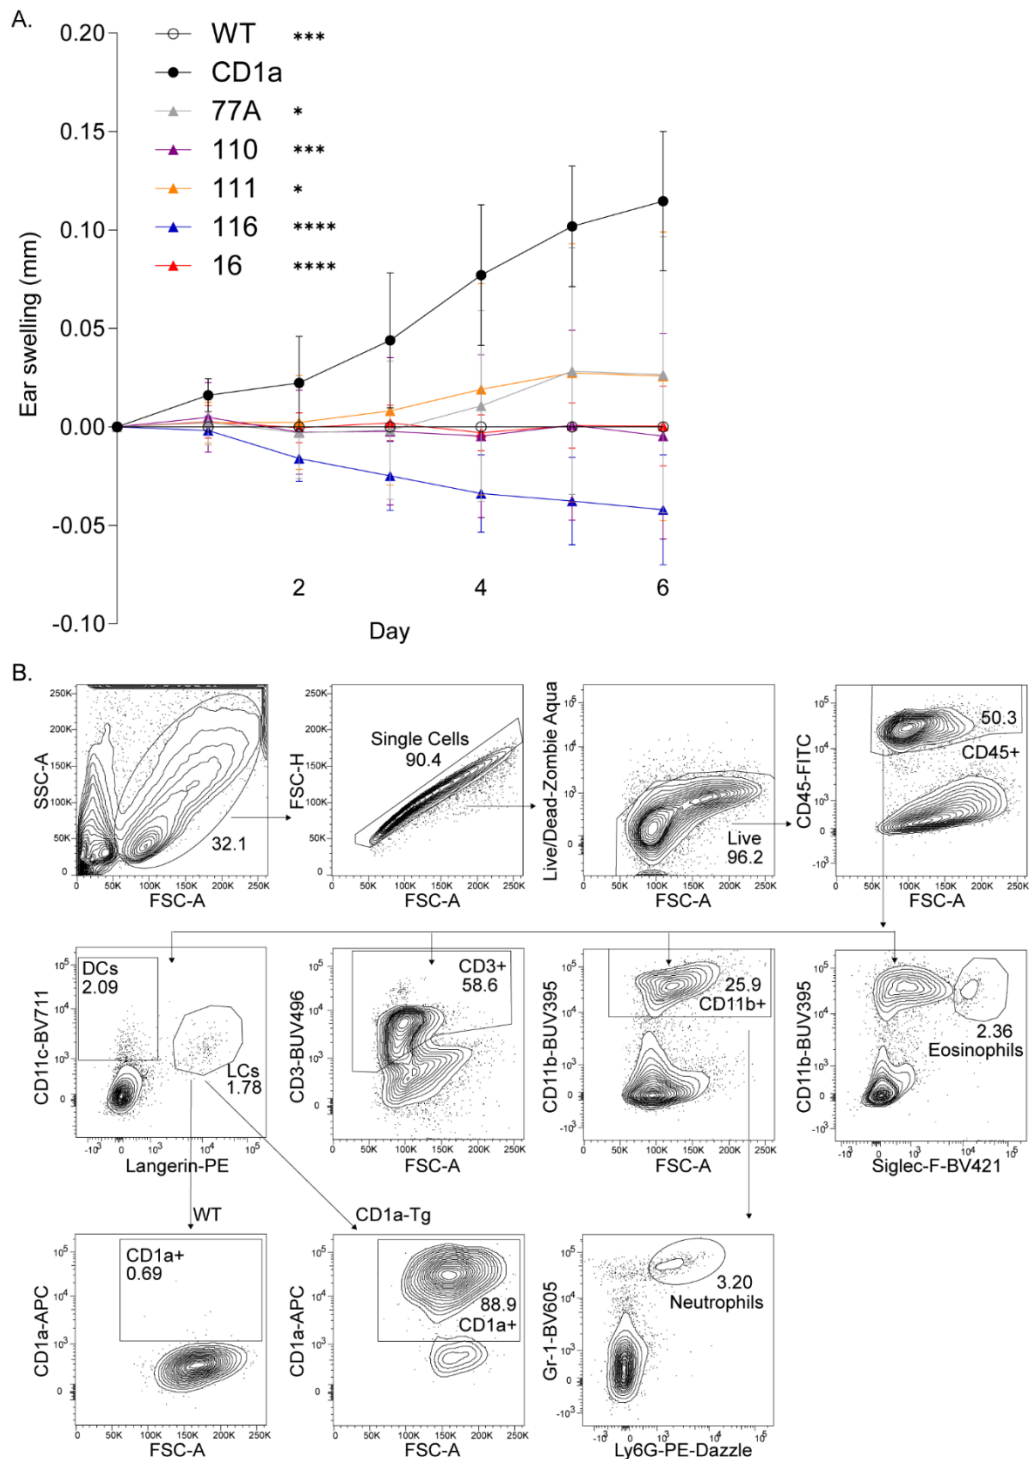

**Supplementary Figure 4. Imiquimod treatment model of murine inflammation. A.** Daily measurement of ear swelling induced by imiquimod treatment of wild-type (WT) and CD1a transgenic mice (CD1a) injected i.p. with mouse IgG1 isotype control and CD1a transgenic injected with the refined panel of anti-CD1a antibodies. Ear thickness was normalised to WT, mean daily WT ear thickness measurement was subtracted from the respective CD1a-Tg daily measurement. Mean  $\pm$  SD is shown. n represents biologically independent animals in each group. n=6 (16) n=8 (all other groups) examined over 3 independent experiments. 2-way-ANOVA with Dunnett's test, \*\*,  $P < 0.01$ ; \*\*\*\*,  $P < 0.0001$  indicates significance at day 6 on comparison to "CD1a". Exact P values: 0.0002 (WT), 0.0415 (77A), 0.0008 (110), 0.0485 (111),  $P < 0.0001$  (116, 16). Source Data are provided as a Source Data file. **B.** Exemplar gating strategies for cell types analysed *in vivo*, skin CD45+, DCs, LC, T cells, Neutrophils and Eosinophils are gated from Imiquimod treated CD1a or WT transgenic mice.

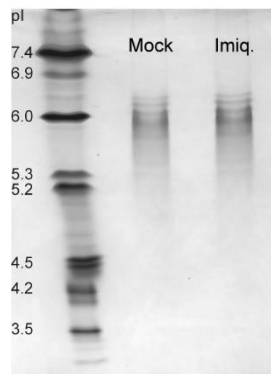

**Supplementary Figure 5. Imiquimod does not constitute a CD1a ligand.** Isoelectric point dependent migration of mock and imiquimod “loaded” CD1a protein on isoelectric focusing (IEF) gel pH3-7, isoelectric point (pI). Mock: vehicle control TBS 2% CHAPS 7% DMSO. Data shown representative of 2 independent experiments.

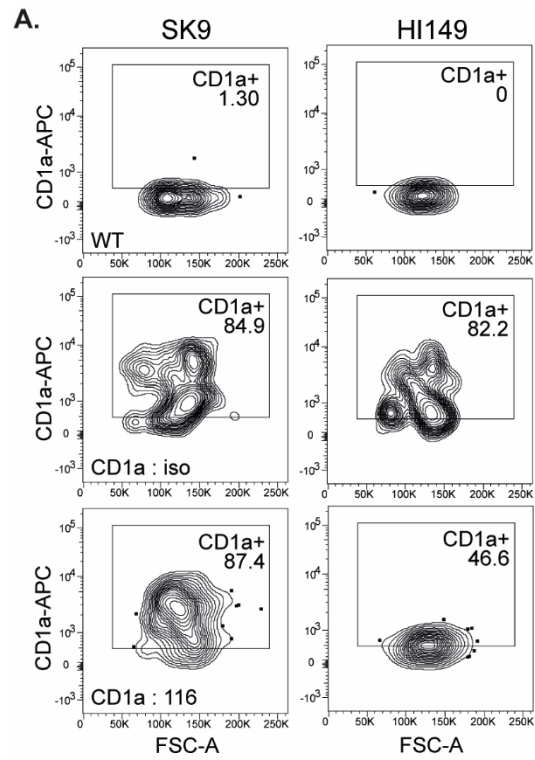

**Supplementary Figure 6. *In vivo* CD1a antibody epitope competition. A.** Flow cytometry plots of CD1a expression as measured by staining with anti-CD1a antibodies SK9 (left panels) or HI149 (right panels). Anti-CD1a antibody OX116 (100 $\mu$ g i.p.) was administered on days 0, 2 and 4 and ear skin tissue collected, processed and stained for CD1a on day 5.

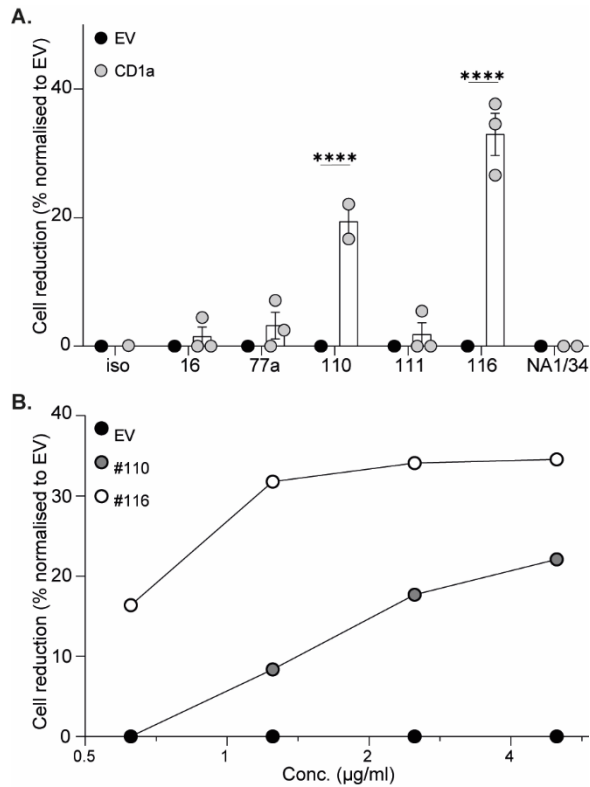

**Supplementary Figure 7. Analysis of anti-CD1a antibody induced phenotype change and cytotoxicity. A.** Flow cytometric analysis of antibody induced CD1a dependent phenotype change and cell reduction. Anti-CD1a antibodies or mouse IgG1 isotype control (iso, 5µg/ml) were incubated with EV or CD1a-K562 as indicated for 48 hours and percentage of antibody induced cell reduction was calculated in relation to a reference population of untreated K562 and was normalised to EV control cells (mean ± SEM). **B.** Dose titration curve of antibody induced CD1a-K562 cell reduction with increasing concentration of anti-CD1a antibody (0.625-5µg/ml). Mean ± SEM is shown. n represents independent cultures of K562 cells. n=3 (isotype, 16, 77A, 111, 116) n=2 (110, NA1/34), examined over 2 independent experiments. grouped analysis Multiple two-tailed T tests with Holm-Sidak correction, mean ± SD, \*\*\*\*P < 0.0001. Exact p-values are: >0.999 (iso, NA1/34), 0.9825 (16), 0.5265 (77A), <0.0001 (110, 116), 0.9476 (111). Source Data are provided as a Source Data file.



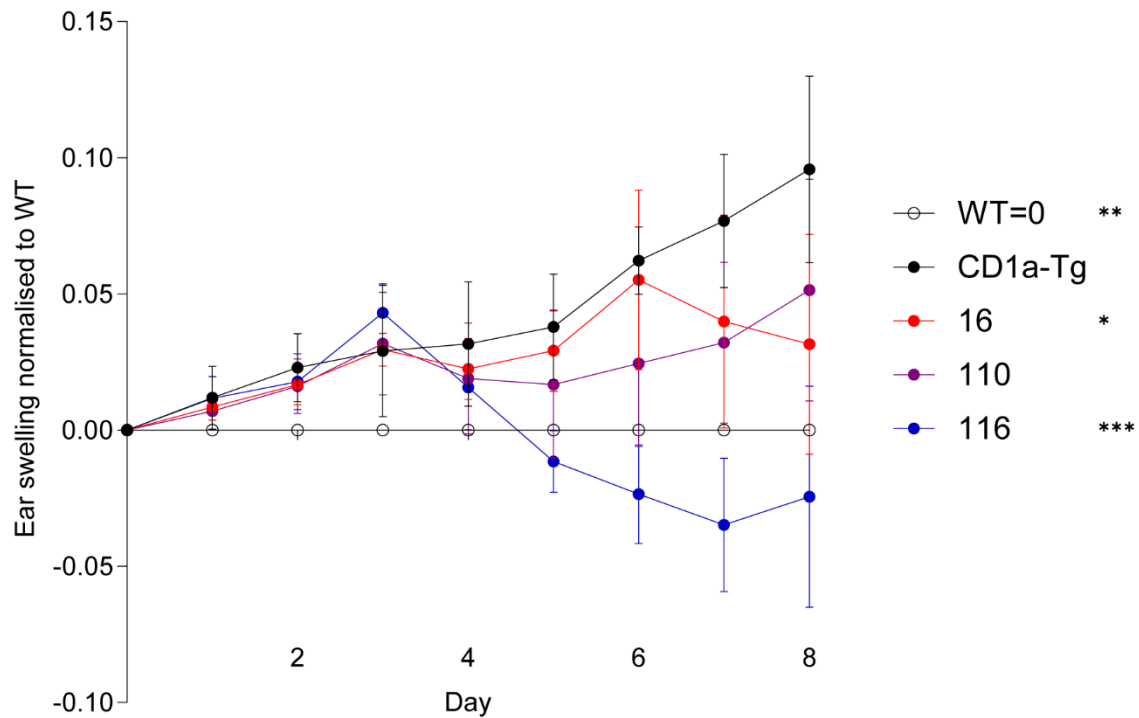

**Supplementary Figure 8. Daily measurement of ear swelling induced by imiquimod treatment of wild-type (WT) and CD1a transgenic mice (CD1a) followed by the treatment i.p. with mouse IgG1 isotype control or CD1a transgenic injected with the refined panel of anti-CD1a antibodies at day 3. Ear thickness was normalised to WT, mean daily WT ear thickness measurement was subtracted from the respective CD1a-Tg daily measurement.**

Mean  $\pm$  SD is shown. n represents biologically independent animals in each group. B. n=4 (WT), n=6 (CD1a), n=8 (16), n=8 (110), n=10 (116), n=2 (WT unchallenged), n=6 (CD1a unchallenged), examined over 3 independent experiments. 2-way-ANOVA with Dunnett's test, \*,  $P < 0.05$ ; \*\*,  $P < 0.01$ ; \*\*\*,  $P < 0.001$ ; indicates significance at day 6 on comparison to "CD1a". Exact P values: (vs CD1a) 0.0028 (WT), 0.0229 (16), 0.1297 (110), 0.0001 (116). Source Data are provided as a Source Data file.

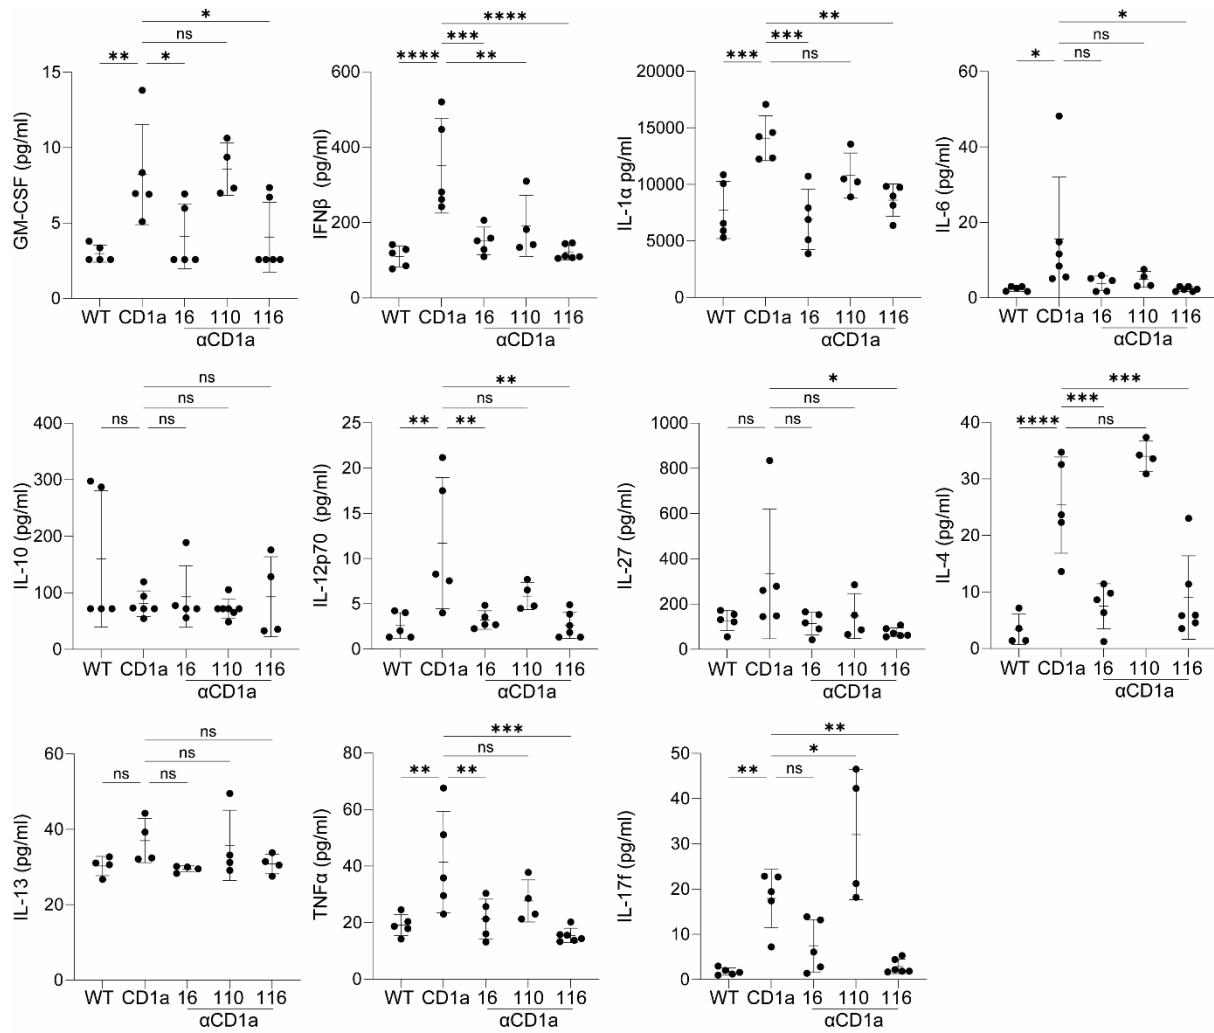

**Supplementary Figure 9. Skin cytokine analysis of imiquimod-induced inflammation.** Skin cytokine levels of mouse IgG1 isotype treated wild-type (WT) and CD1a transgenic (CD1a); and CD1a transgenic injected with anti-CD1a antibodies following the treatment model of administration as measured by cytometric bead array. Mean  $\pm$  SD is shown. n represents biologically independent animals in each group. n=5 (WT, CD1a, 16), n=4 (110), n=6 (116), examined over 3 independent experiments. 1-way-ANOVA with Dunnett's test, \*,  $P < 0.05$ ; \*\*,  $P < 0.01$ ; \*\*\*,  $P < 0.001$ ; \*\*\*\*,  $P < 0.0001$ . Exact p-values are recorded in supplementary table 8. Source Data are provided as a Source Data file.

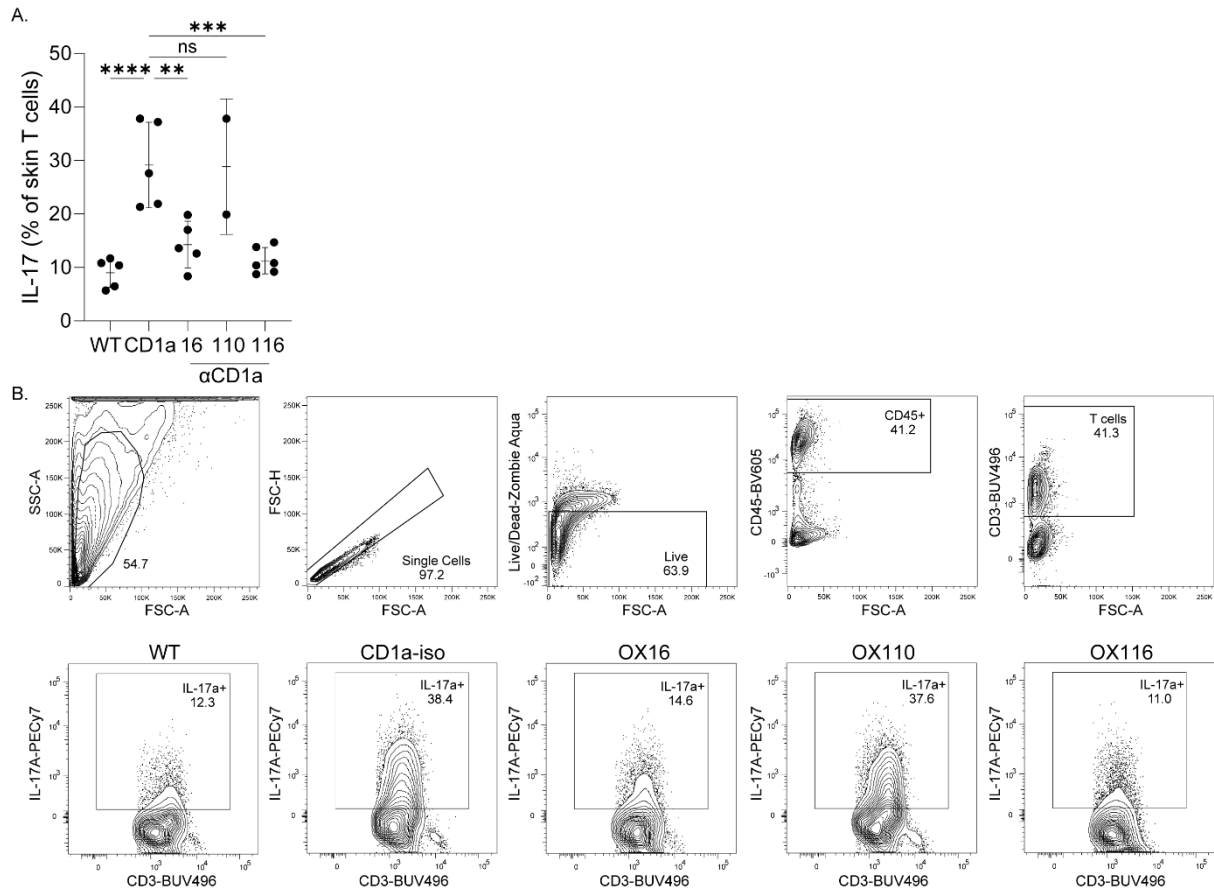

**Supplementary Figure 10. Skin cytokine analysis of imiquimod-induced inflammation. A-B.** Skin IL-17A production by CD3+ T cells of mouse IgG1 isotype treated wild-type (WT) and CD1a transgenic (CD1a); and CD1a transgenic injected with anti-CD1a antibodies following the treatment model of administration as measured by intracellular flow cytometric staining, A. graphical summary and B. representative flow cytometry plots. Mean  $\pm$  SD is shown. n represents biologically independent animals in each group. n=5 (WT, CD1a, 16), n=2 (110), n=6 (116), examined over 2 independent experiments. 1-way-ANOVA with Dunnett's test, \*\*, P < 0.01; \*\*\*, P < 0.001; \*\*\*\*, P < 0.0001. Exact p-values are: <0.0001 (WT), 0.0018 (16), 0.0002 (116), >0.9999 (110). Source Data are provided as a Source Data file.

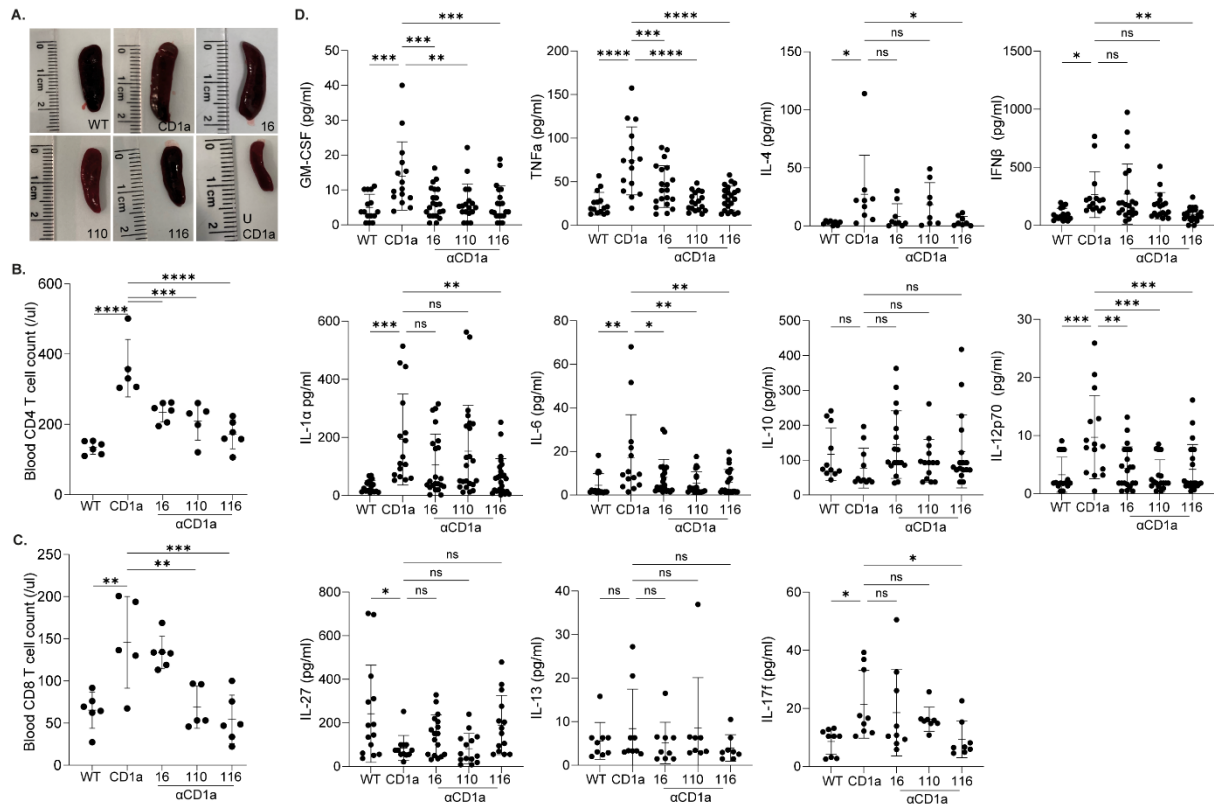

**Supplementary Figure 11. Investigation of the CD1a dependency of the systemic effects of imiquimod application.** **A.** Spleen representative images on day 8 by imiquimod treatment of wild-type (WT) and CD1a transgenic mice (CD1a) followed by treatment i.p. with mouse IgG1 isotype control or CD1a transgenic injected with the refined panel of anti-CD1a antibodies as in the schematic (Fig. 8A). **B-C.** Blood cellular analysis of the blood of mouse IgG1 isotype treated wild-type (WT) and CD1a transgenic (CD1a); and CD1a transgenic injected with the refined panel of anti-CD1a antibodies following the treatment model of administration. Circulating CD4<sup>+</sup> (B.) and CD8<sup>+</sup> (C.) T cells were enumerated. **D.** Plasma cytokine levels of the blood of mouse IgG1 isotype treated wild-type (WT) and CD1a transgenic (CD1a); and CD1a transgenic injected with anti-CD1a antibodies following the treatment model of administration as measured by cytometric bead array. Mean ± SD is shown. n represents biologically independent animals in each group. 1-way-ANOVA with Dunnett's test, \*, P < 0.05; \*\*, P < 0.01; \*\*\*, P < 0.001; \*\*\*\*, P < 0.0001. B-C. examined over 3 independent experiments. D. examined over 3 (IFNβ, IL-1α, IL-6, IL-27, IL-13, IL-17f) or 4 (GM-CSF, TNFα, IL-4, IL-10, IL-12p70) independent experiments. Exact p-values are recorded in supplementary table 9. Source Data are provided as a Source Data file.

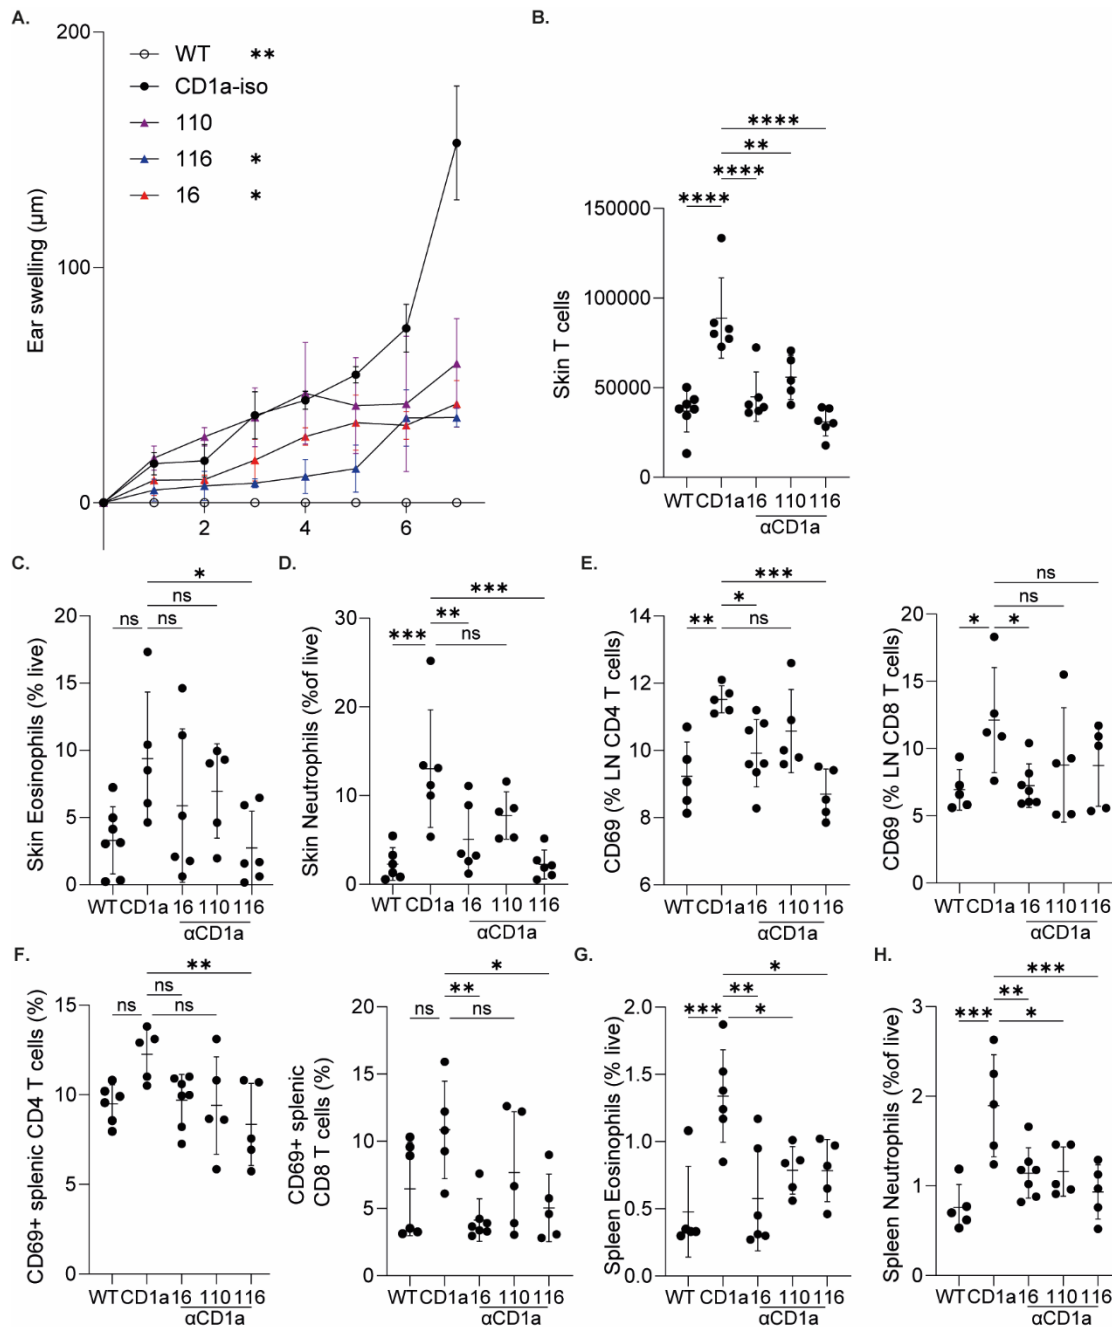

**Supplementary Figure 12. Analysis of the contribution of CD1a to MC903-induced inflammation.** **A.** Normalised daily measurement of ear swelling induced by MC903 treatment of wild-type (WT) and CD1a transgenic mice (CD1a) and countered by the treatment i.p. with mouse IgG1 isotype control or CD1a transgenic injected with anti-CD1a antibodies. Ear thickness was normalised to WT, mean daily WT ear thickness measurement was subtracted from the respective CD1a-Tg daily measurement. **B-H.** Flow cytometric analysis of immune cells derived of mouse IgG1 isotype treated wild-type (WT) and CD1a transgenic (CD1a) and CD1a transgenic injected with the refined panel of anti-CD1a antibodies. Skin T cells (/ear) (B.), eosinophils (C.) and neutrophils (D.) were enumerated, CD69 expression was assessed on CD4 and CD8 LN T cells (E.), and CD4 and CD8 splenic T cells (F.), and splenic eosinophils (G.) and neutrophils (H.) were enumerated. Mean  $\pm$  SD is shown. n represents biologically independent animals in each group. A. n=5 for all groups, 2-way-ANOVA with Dunnett's test, \*\*,  $P < 0.01$ ; \*\*\*\*,  $P < 0.0001$  indicates significance on comparison to "CD1a" at day 7, examined over 2 independent experiments. B-D. n=7 (WT), n=6 (CD1a, 16, 116), n=5 (110), examined over 2 independent experiments. 1-way-ANOVA with Dunnett's test, \*,  $P < 0.05$ ; \*\*,  $P < 0.01$ ; \*\*\*,  $P < 0.001$ ; \*\*\*\*,  $P < 0.0001$ . E-H. n=5 (WT, CD1a, 110, 116), n=7 (16), examined over 2 independent experiments. 1-way-ANOVA with Dunnett's test, \*,  $P < 0.05$ ; \*\*,  $P < 0.01$ ; \*\*\*,  $P < 0.001$ ; \*\*\*\*,  $P < 0.0001$ . Exact p-values are recorded in supplementary table 10. Source Data are provided as a Source Data file.

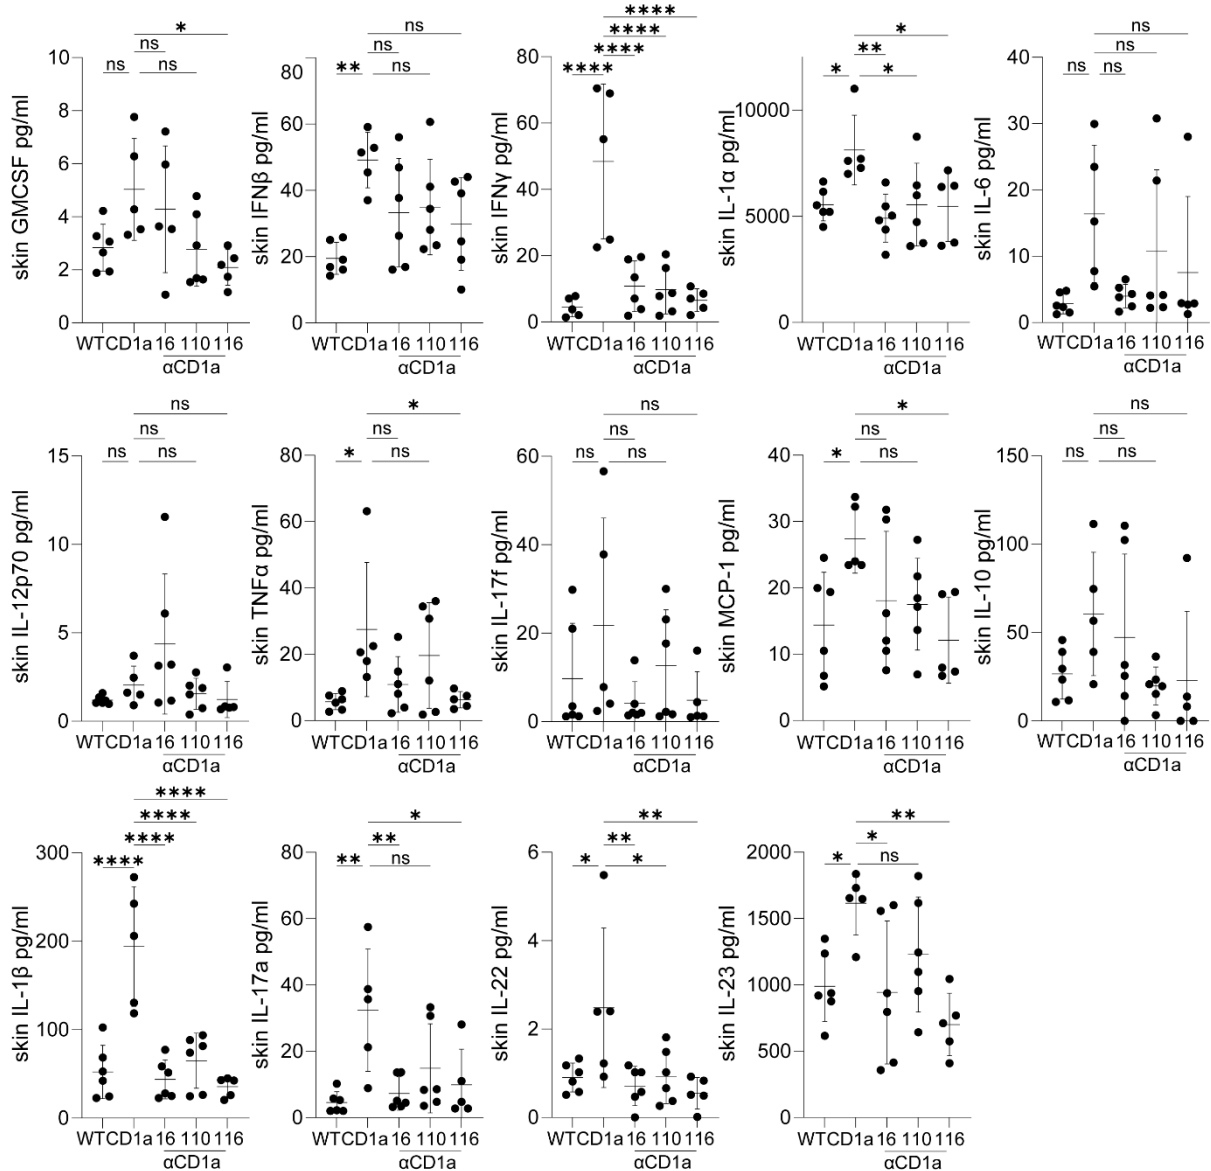

**Supplementary Figure 13. Skin cytokine analysis of MC903-induced inflammation.** Skin cytokine levels of mouse IgG1 isotype treated wild-type (WT) and CD1a transgenic (CD1a); and CD1a transgenic injected with anti-CD1a antibodies following the MC903 model of skin inflammation, as measured by cytometric bead. Mean  $\pm$  SD is shown. n represents biologically independent animals in each group. N=6 (WT, 110), n=5 (CD1a, 116, 16), 2-way-ANOVA with Dunnett's test, \*, P < 0.05; \*\*, P < 0.01; \*\*\*, P < 0.001; \*\*\*\*, P < 0.0001 indicates significance on comparison to "CD1a" at day 7, examined over 2 independent experiments. Exact p-values are recorded in supplementary table 11. Source Data are provided as a Source Data file.

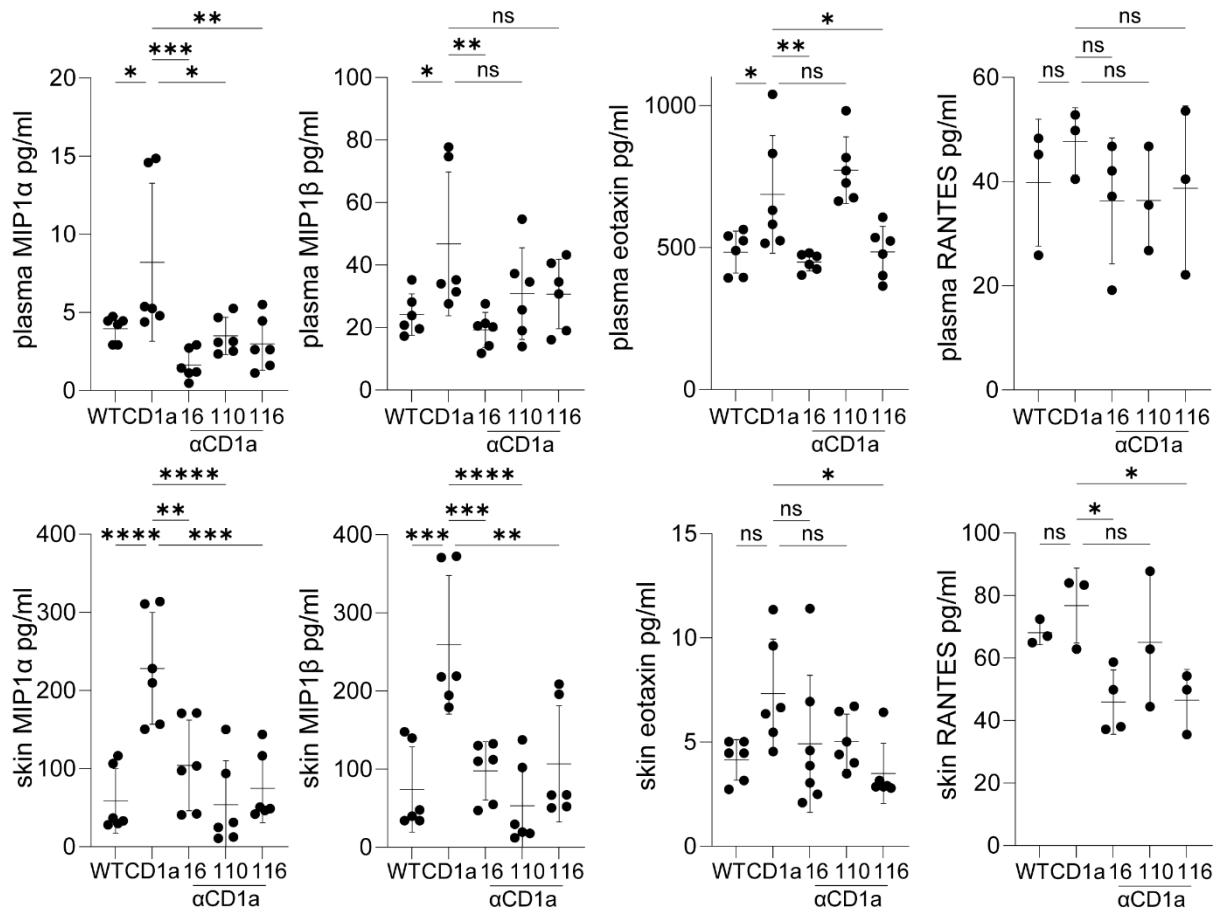

**Supplementary Figure 14. Skin and plasma chemokine analysis of MC903-induced inflammation.** Skin and plasma chemokine levels of mouse IgG1 isotype treated wild-type (WT) and CD1a transgenic (CD1a); and CD1a transgenic injected with anti-CD1a antibodies following the MC903 model of skin inflammation, as measured by cytometric bead array. Mean  $\pm$  SD is shown. n represents biologically independent animals in each group. N=3 (RANTES), N=6 (all others), 2-way-ANOVA with Dunnett's test, \*, P < 0.05; \*\*, P < 0.01; \*\*\*, P < 0.001; \*\*\*\*, P < 0.0001 indicates significance on comparison to "CD1a" at day 7, examined over 2 independent experiments. Exact p-values are recorded in supplementary table 12. Source Data are provided as a Source Data file.

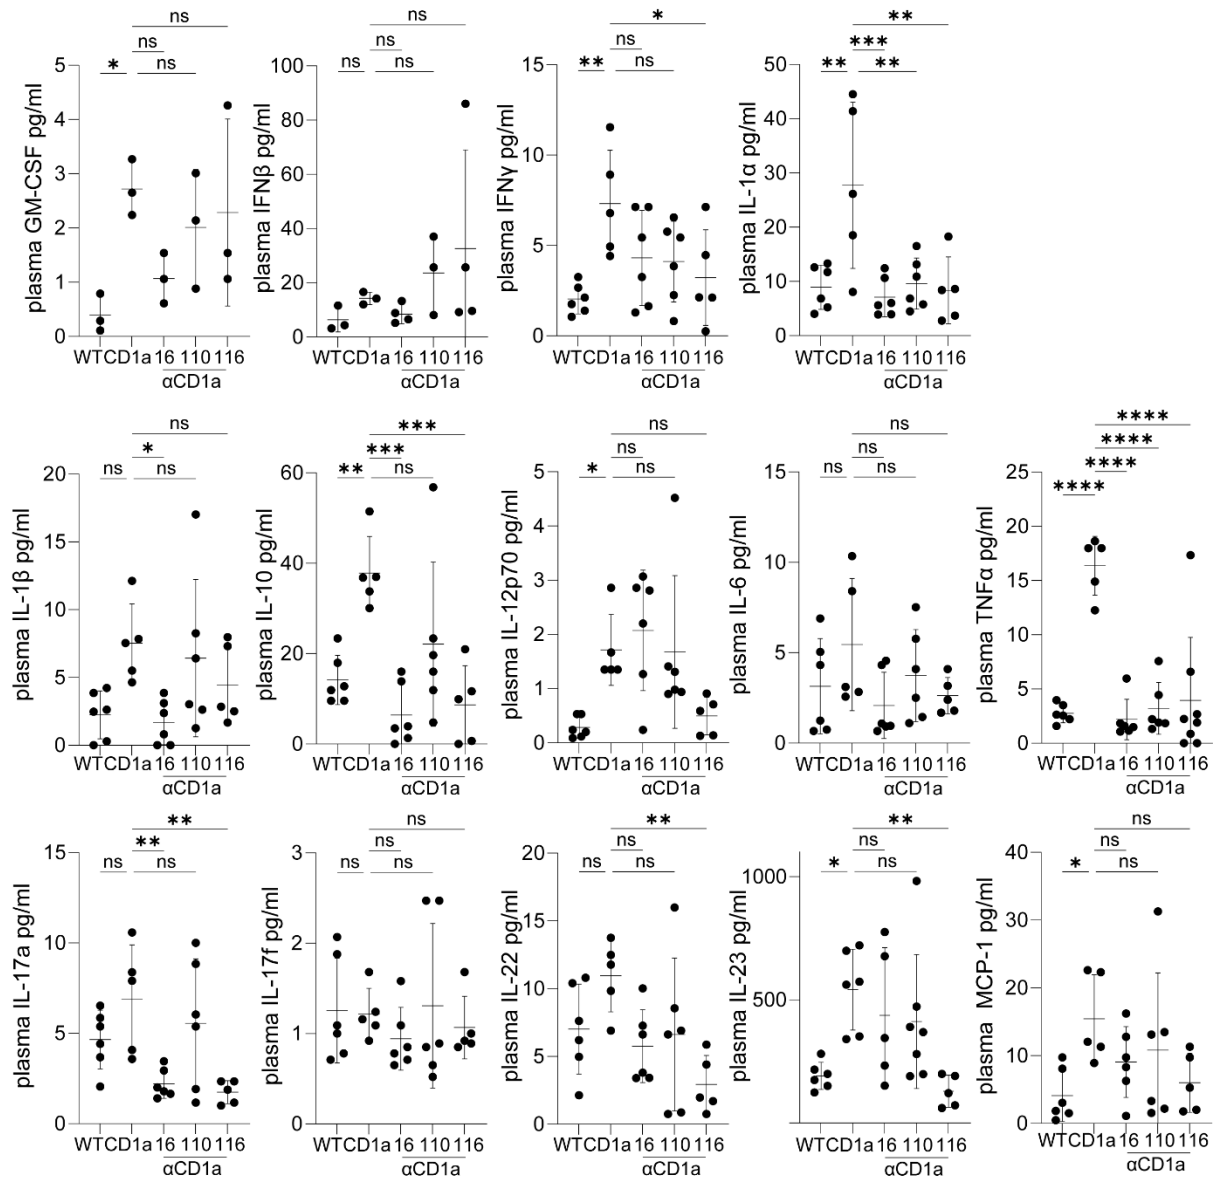

**Supplementary Figure 15. Plasma cytokine analysis of MC903-induced inflammation.** Plasma cytokine levels of mouse IgG1 isotype treated wild-type (WT) and CD1a transgenic (CD1a); and CD1a transgenic injected with anti-CD1a antibodies following the MC903 model of skin inflammation, as measured by cytometric bead array. Mean  $\pm$  SD is shown. n represents biologically independent animals in each group. N=3 (GM-CSF, IFN $\beta$ ), N=6 (all others WT, 110, 16) n=5 (all others CD1a, 116), 2-way-ANOVA with Dunnett's test, \*, P < 0.05; \*\*, P < 0.01; \*\*\*, P < 0.001; \*\*\*\*, P < 0.0001 indicates significance on comparison to "CD1a" at day 7, examined over 2 independent experiments. Exact p-values are recorded in supplementary table 13. Source Data are provided as a Source Data file.



**Supplementary Table 1. Exact P values for Figure 1.**

| <b>Comparison</b> | <b>P value</b> |
|-------------------|----------------|
| T cells           | 0.030122       |
| Eosinophils       | 0.000081       |
| Neutrophils       | 0.0081         |
| Langerhans cells  | 0.011957       |

**Supplementary Table 2. Exact P values for Figure 2.**

| Comparison                 | P value |
|----------------------------|---------|
| Fig. 2B: Dunnett's vs CD1a |         |
| EV                         | 0.0032  |
| 16                         | 0.9997  |
| 34                         | 0.9919  |
| 46                         | 0.8561  |
| 77A                        | 0.1495  |
| 94                         | 0.997   |
| 99                         | 0.9996  |
| 110                        | 0.9938  |
| 111                        | 0.9223  |
| 116                        | 0.027   |
|                            |         |
| Fig. 2C Tukey's vs CD1a    |         |
| 16                         | 0.0327  |
| 34                         | 0.9975  |
| 46                         | >0.9999 |
| 77A                        | >0.9999 |
| 94                         | 0.9356  |
| 99                         | >0.9999 |
| 110                        | 0.9991  |
| 111                        | 0.9872  |
| 116                        | 0.904   |
|                            |         |
| Fig. 2D Tukey's vs CD1a    |         |
| 16                         | 0.4361  |
| 34                         | 0.871   |
| 46                         | 0.6215  |
| 77A                        | 0.0002  |
| 94                         | 0.735   |
| 99                         | 0.3943  |
| 110                        | <0.0001 |
| 111                        | 0.0001  |
| 116                        | 0.0029  |

**Supplementary Table 3. Exact P values for Figure 4.**

| Comparison                | P value |
|---------------------------|---------|
| Fig. 4B Tukey's vs CD1a   |         |
| WT                        | <0.0001 |
| 16                        | <0.0001 |
| 77A                       | <0.0001 |
| 110                       | <0.0001 |
| 111                       | <0.0001 |
| 116                       | <0.0001 |
| WT vs 116                 | 0.0272  |
| Fig. 4D Tukey's vs CD1a   |         |
| WT                        | 0.0582  |
| 16                        | 0.0012  |
| 77A                       | 0.4149  |
| 110                       | 0.0124  |
| 111                       | 0.3282  |
| 116                       | 0.0018  |
| Fig. 4E Tukey's vs CD1a   |         |
| WT                        | 0.0084  |
| 16                        | 0.0198  |
| 77A                       | 0.0932  |
| 110                       | 0.1335  |
| 111                       | 0.9994  |
| 116                       | 0.0217  |
| Fig. 4F Tukey's vs CD1a   |         |
| WT                        | 0.0181  |
| 16                        | 0.0293  |
| 77A                       | 0.8785  |
| 110                       | >0.9999 |
| 111                       | 0.8922  |
| 116                       | 0.0003  |
| Fig. 4G Dunnett's vs CD1a |         |
| WT                        | 0.0979  |
| 16                        | 0.1723  |
| 77A                       | 0.3465  |
| 110                       | 0.0006  |
| 111                       | 0.9914  |
| 116                       | 0.0006  |
| Fig. 4H Tukey's vs CD1a   |         |
| WT                        | 0.0929  |
| 16                        | 0.0148  |
| 77A                       | >0.9999 |
| 110                       | 0.1554  |
| 111                       | 0.0169  |
| 116                       | 0.0009  |
| Fig. 4I Dunnett's vs CD1a |         |
| WT                        | 0.0441  |
| 16                        | 0.9463  |
| 77A                       | 0.1197  |
| 110                       | 0.014   |
| 111                       | 0.8663  |
| 116                       | 0.0007  |
| Fig. 4J Tukey's vs CD1a   |         |

|                         |         |
|-------------------------|---------|
| WT                      | <0.0001 |
| 16                      | 0.9892  |
| 77A                     | 0.9998  |
| 110                     | <0.0001 |
| 111                     | 0.9983  |
| 116                     | <0.0001 |
| Fig. 4K Tukey's vs CD1a |         |
| WT                      | <0.0001 |
| 16                      | >0.9999 |
| 77A                     | 0.4647  |
| 110                     | <0.0001 |
| 111                     | 0.0053  |
| 116                     | <0.0001 |

**Supplementary Table 4. Exact P values for Figure 5.**

| <b>Comparison</b>           | <b>P value</b> |
|-----------------------------|----------------|
| Fig. 5A LC day 0 vs isotype |                |
| 16                          | 0.6733         |
| 77A                         | 0.9266         |
| 110                         | <0.0001        |
| 111                         | 0.9997         |
| 116                         | <0.0001        |
| LC day 2 vs isotype         |                |
| 16                          | 0.9674         |
| 77A                         | 0.9988         |
| 110                         | <0.0001        |
| 111                         | >0.9999        |
| 116                         | <0.0001        |
| DC day 0 vs isotype         |                |
| 16                          | 0.747          |
| 77A                         | 0.4858         |
| 110                         | 0.9346         |
| 111                         | 0.9392         |
| 116                         | 0.1529         |
| DC day 2 vs isotype         |                |
| 16                          | 0.9999         |
| 77A                         | 0.9999         |
| 110                         | 0.7813         |
| 111                         | >0.9999        |
| 116                         | 0.0431         |
| Fig. 5C: EV vs CD1a         |                |
| 16                          | 0.9967         |
| 110                         | <0.0001        |
| 116                         | <0.0001        |
| Fig. 5D: vs isotype         |                |
| 16                          | 0.9801         |
| 110                         | 0.0003         |
| 116                         | <0.0001        |
| Fig. 5E: vs isotype         |                |
| 16                          | 0.0216         |
| 110                         | 0.0012         |
| 116                         | 0.0006         |

**Supplementary Table 5. Exact P values for Figure 6.**

| Comparison                             | P value |
|----------------------------------------|---------|
| Fig. 6B Dunnett's vs CD1a              |         |
| WT                                     | <0.0001 |
| 16                                     | <0.0001 |
| 110                                    | 0.0003  |
| 116                                    | <0.0001 |
| Unchallenged WT                        | <0.0001 |
| Unchallenged CD1a Tg                   | <0.0001 |
| Fig. 6E Tukey's vs CD1a                |         |
| WT                                     | 0.0003  |
| 16                                     | 0.8675  |
| 110                                    | 0.0866  |
| 116                                    | 0.0011  |
| Fig. 6E CD11a: Dunnett's vs CD1a       |         |
| WT                                     | 0.0178  |
| 16                                     | 0.9968  |
| 110                                    | 0.008   |
| 116                                    | <0.0001 |
| Fig. 6F Dunnett's vs CD1a              |         |
| WT                                     | 0.0016  |
| 16                                     | >0.9999 |
| 110                                    | 0.0022  |
| 116                                    | 0.0092  |
| Fig. 6G Dunnett's vs CD1a              |         |
| WT                                     | 0.0006  |
| 16                                     | 0.0309  |
| 110                                    | 0.0002  |
| 116                                    | 0.0006  |
| Fig. 6H IFN $\gamma$ Dunnett's vs CD1a |         |
| WT                                     | <0.0001 |
| 16                                     | 0.0002  |
| 110                                    | 0.0002  |
| 116                                    | <0.0001 |
| Fig. 6H IL-1 $\beta$                   |         |
| WT                                     | 0.018   |
| 16                                     | 0.0055  |
| 110                                    | 0.9999  |
| 116                                    | 0.0054  |
| Fig. 6H MCP1                           |         |
| WT                                     | 0.0016  |
| 16                                     | 0.0129  |
| 110                                    | 0.0463  |
| 116                                    | 0.0016  |
| Fig. 6H IL-9                           |         |
| WT                                     | 0.0014  |
| 16                                     | 0.0007  |
| 110                                    | 0.85    |
| 116                                    | 0.0009  |
| Fig. 6H IL-5                           |         |
| WT                                     | 0.0075  |
| 16                                     | 0.0122  |
| 110                                    | 0.0191  |

|                |         |
|----------------|---------|
| 116            | 0.01    |
| Fig. 6H IL-22  |         |
| WT             | <0.0001 |
| 16             | 0.0003  |
| 110            | >0.9999 |
| 116            | <0.0001 |
| Fig. 6H IL-17a |         |
| WT             | 0.0003  |
| 16             | 0.0003  |
| 110            | 0.9694  |
| 116            | 0.0002  |
| Fig. 6H IL-23  |         |
| WT             | <0.0001 |
| 16             | <0.0001 |
| 110            | <0.0001 |
| 116            | <0.0001 |

**Supplementary Table 6. Exact P values for Figure 7.**

| Comparison                             | P value | Group size (N=) |
|----------------------------------------|---------|-----------------|
| Fig. 7A Dunnett's vs CD1a              |         | CD1a = 8        |
| WT                                     | 0.0198  | 7               |
| 16                                     | 0.4391  | 9               |
| 110                                    | 0.0045  | 7               |
| 116                                    | 0.0002  | 8               |
| Fig. 7B Dunnett's vs CD1a              |         | CD1a = 8        |
| WT                                     | 0.0103  | 7               |
| 16                                     | 0.9999  | 9               |
| 110                                    | 0.2487  | 9               |
| 116                                    | 0.0056  | 9               |
| Fig. 7C Dunnett's vs CD1a              |         | CD1a = 8        |
| WT                                     | <0.0001 | 7               |
| 16                                     | 0.1505  | 9               |
| 110                                    | 0.0002  | 9               |
| 116                                    | 0.0009  | 8               |
| Fig. 7D Dunnett's vs CD1a              |         | CD1a = 8        |
| WT                                     | 0.1585  | 7               |
| 16                                     | 0.3516  | 7               |
| 110                                    | 0.3409  | 8               |
| 116                                    | 0.2881  | 7               |
| Fig. 7E Dunnett's vs CD1a              |         | CD1a = 8        |
| WT                                     | <0.0001 | 7               |
| 16                                     | 0.0313  | 9               |
| 110                                    | <0.0001 | 9               |
| 116                                    | <0.0001 | 9               |
| Fig. 7F Dunnett's vs CD1a              |         | CD1a = 5        |
| WT                                     | <0.0001 | 6               |
| 16                                     | 0.0043  | 6               |
| 110                                    | <0.0001 | 5               |
| 116                                    | <0.0001 | 6               |
| Fig. 7G Dunnett's vs CD1a              |         | CD1a = 5        |
| WT                                     | 0.0008  | 6               |
| 16                                     | 0.0013  | 6               |
| 110                                    | 0.0017  | 5               |
| 116                                    | 0.0001  | 7               |
| Fig. 7H Dunnett's vs CD1a              |         | CD1a = 5        |
| WT                                     | <0.0001 | 6               |
| 16                                     | 0.0032  | 5               |
| 110                                    | 0.002   | 5               |
| 116                                    | <0.0001 | 7               |
| Fig. 7I IFN $\gamma$ Dunnett's vs CD1a |         | CD1a = 12       |
| WT                                     | 0.002   | 11              |
| 16                                     | 0.0007  | 14              |
| 110                                    | 0.0012  | 13              |
| 116                                    | 0.0008  | 16              |
| Fig. 7I IL-1 $\beta$                   |         | CD1a = 16       |
| WT                                     | <0.0001 | 15              |
| 16                                     | 0.3284  | 19              |
| 110                                    | <0.0001 | 18              |
| 116                                    | <0.0001 | 22              |
| Fig. 7I MCP1                           |         | CD1a = 15       |



|                |         |           |
|----------------|---------|-----------|
| WT             | <0.0001 | 15        |
| 16             | 0.0125  | 20        |
| 110            | <0.0001 | 18        |
| 116            | <0.0001 | 21        |
| Fig. 7I IL-9   |         | CD1a = 7  |
| WT             | <0.0001 | 9         |
| 16             | 0.0004  | 9         |
| 110            | 0.0022  | 8         |
| 116            | 0.0002  | 8         |
| Fig. 7I IL-5   |         | CD1a = 9  |
| WT             | 0.0066  | 9         |
| 16             | 0.0049  | 9         |
| 110            | 0.0443  | 8         |
| 116            | 0.0184  | 8         |
| Fig. 7I IL-22  |         | CD1a = 10 |
| WT             | 0.059   | 8         |
| 16             | 0.0205  | 8         |
| 110            | 0.3994  | 8         |
| 116            | 0.0236  | 8         |
| Fig. 7I IL-17a |         | CD1a = 15 |
| WT             | <0.0001 | 15        |
| 16             | <0.0001 | 23        |
| 110            | <0.0001 | 19        |
| 116            | <0.0001 | 20        |
| Fig. 7I IL-23  |         | CD1a = 15 |
| WT             | <0.0001 | 15        |
| 16             | <0.0001 | 20        |
| 110            | <0.0001 | 18        |
| 116            | <0.0001 | 19        |

**Supplementary Table 7. Exact P values for Figure 8.**

| Comparison                        | P value |
|-----------------------------------|---------|
| Fig. 8B Dunnett's vs CD1a         |         |
| WT                                | 0.0039  |
| 16                                | 0.0276  |
| 110                               | 0.0717  |
| 116                               | 0.0142  |
| Fig. 8D Dunnett's vs CD1a T cells |         |
| WT                                | 0.003   |
| 16                                | 0.011   |
| 110                               | 0.1337  |
| 116                               | 0.0005  |
| Eosinophils                       |         |
| WT                                | 0.0046  |
| 16                                | 0.0503  |
| 110                               | 0.3316  |
| 116                               | 0.0024  |
| Neutrophils                       |         |
| WT                                | 0.0015  |
| 16                                | 0.0083  |
| 110                               | 0.0735  |
| 116                               | 0.0009  |
| LCs                               |         |
| WT                                | 0.0034  |
| 16                                | 0.0044  |
| 110                               | 0.0105  |
| 116                               | 0.0012  |
| Fig. 8E Dunnett's vs CD1a IL-4    |         |
| WT                                | <0.0001 |
| 16                                | <0.0001 |
| 110                               | <0.0001 |
| 116                               | <0.0001 |
| Fig. 8E IL-5                      |         |
| WT                                | 0.0014  |
| 16                                | 0.0003  |
| 110                               | 0.0008  |
| 116                               | 0.0002  |
| Fig. 8E IL-9                      |         |
| WT                                | 0.0155  |
| 16                                | 0.0074  |
| 110                               | 0.2238  |
| 116                               | 0.0242  |
| Fig. 8E IL-13                     |         |
| WT                                | 0.0014  |
| 16                                | 0.0006  |
| 110                               | 0.0022  |
| 116                               | 0.0018  |
| Fig. 8F Dunnett's vs CD1a T cells |         |
| WT                                | 0.0251  |
| 16                                | 0.5874  |
| 110                               | 0.9307  |
| 116                               | 0.471   |
| Fig. 8F CD4 CD11a                 |         |

|                                |        |
|--------------------------------|--------|
| WT                             | 0.1882 |
| 16                             | 0.007  |
| 110                            | 0.303  |
| 116                            | 0.0165 |
| Fig. 8F CD8 CD11a              |        |
| WT                             | 0.0028 |
| 16                             | 0.0031 |
| 110                            | 0.0079 |
| 116                            | 0.0002 |
| Fig. 8F eosinophils            |        |
| WT                             | 0.0468 |
| 16                             | 0.05   |
| 110                            | 0.0548 |
| 116                            | 0.0288 |
| Fig. 8F neutrophils            |        |
| WT                             | 0.3211 |
| 16                             | 0.5046 |
| 110                            | 0.146  |
| 116                            | 0.5198 |
| Fig. 8G Dunnett's vs CD1a IL-4 |        |
| WT                             | 0.4004 |
| 16                             | 0.006  |
| 110                            | 0.1065 |
| 116                            | 0.0026 |
| Fig. 8E IL-5                   |        |
| WT                             | 0.0078 |
| 16                             | 0.0004 |
| 110                            | 0.0778 |
| 116                            | 0.0104 |
| Fig. 8E IL-9                   |        |
| WT                             | 0.2039 |
| 16                             | 0.1374 |
| 110                            | 0.9485 |
| 116                            | 0.1396 |
| Fig. 8E IL-13                  |        |
| WT                             | 0.0111 |
| 16                             | 0.0131 |
| 110                            | 0.0931 |
| 116                            | 0.0082 |

**Supplementary Table 8. Exact P values for Supplementary Figure 9.**

| Comparison            | P value |
|-----------------------|---------|
| GM-CSF vs CD1a        |         |
| WT                    | 0.0049  |
| 16                    | 0.03    |
| 110                   | 0.9975  |
| 116                   | 0.0205  |
| IFN $\beta$ vs CD1a   |         |
| WT                    | <0.0001 |
| 16                    | 0.0006  |
| 110                   | 0.0083  |
| 116                   | <0.0001 |
| IL-1 $\alpha$ vs CD1a |         |
| WT                    | 0.0007  |
| 16                    | 0.0002  |
| 110                   | 0.1093  |
| 116                   | 0.0028  |
| IL-6 vs CD1a          |         |
| WT                    | 0.0458  |
| 16                    | 0.0831  |
| 110                   | 0.1641  |
| 116                   | 0.0335  |
| IL-10 vs CD1a         |         |
| WT                    | 0.16    |
| 16                    | 0.993   |
| 110                   | 0.9949  |
| 116                   | 0.9978  |
| IL-12p70 vs CD1a      |         |
| WT                    | 0.0018  |
| 16                    | 0.0035  |
| 110                   | 0.0677  |
| 116                   | 0.0013  |
| IL-27 vs CD1a         |         |
| WT                    | 0.088   |
| 16                    | 0.065   |
| 110                   | 0.1705  |
| 116                   | 0.0192  |
| IL-4 vs CD1a          |         |
| WT                    | <0.0001 |
| 16                    | 0.0005  |
| 110                   | 0.1317  |
| 116                   | 0.0008  |
| IL-13 vs CD1a         |         |
| WT                    | 0.243   |
| 16                    | 0.1717  |
| 110                   | 0.99    |
| 116                   | 0.3077  |
| TNF $\alpha$ vs CD1a  |         |
| WT                    | 0.0042  |
| 16                    | 0.0097  |
| 110                   | 0.1224  |
| 116                   | 0.0007  |
| IL-17f vs CD1a        |         |
| WT                    | 0.0047  |

|     |        |
|-----|--------|
| 16  | 0.0813 |
| 110 | 0.0203 |
| 116 | 0.006  |

**Supplementary Table 9. Exact P values for Supplementary Figure 11.**

| Comparison                  | P value | Group size (N=) |
|-----------------------------|---------|-----------------|
| Fig. S11B Dunnett's vs CD1a |         | CD1a = 5        |
| WT                          | <0.0001 | 6               |
| 16                          | 0.0009  | 6               |
| 110                         | 0.0002  | 110             |
| 116                         | <0.0001 | 6               |
| Fig. S11C Dunnett's vs CD1a |         | CD1a = 5        |
| WT                          | 0.0011  | 6               |
| 16                          | 0.9151  | 6               |
| 110                         | 0.0028  | 110             |
| 116                         | 0.0003  | 6               |
| Fig. S11D GM-CSF vs CD1a    |         | CD1a = 15       |
| WT                          | 0.0003  | 15              |
| 16                          | 0.001   | 21              |
| 110                         | 0.0014  | 18              |
| 116                         | 0.0007  | 20              |
| TNF $\alpha$ vs CD1a        |         | CD1a = 15       |
| WT                          | <0.0001 | 15              |
| 16                          | 0.0006  | 20              |
| 110                         | <0.0001 | 18              |
| 116                         | <0.0001 | 22              |
| IL-4 vs CD1a                |         | CD1a = 9        |
| WT                          | 0.0327  | 8               |
| 16                          | 0.1112  | 9               |
| 110                         | 0.7257  | 8               |
| 116                         | 0.0479  | 8               |
| IFN $\beta$ vs CD1a         |         | CD1a = 15       |
| WT                          | 0.0161  | 15              |
| 16                          | 0.9999  | 21              |
| 110                         | 0.256   | 18              |
| 116                         | 0.0075  | 20              |
| IL-1 $\alpha$ vs CD1a       |         | CD1a = 16       |
| WT                          | 0.0003  | 18              |
| 16                          | 0.0632  | 22              |
| 110                         | 0.6157  | 23              |
| 116                         | 0.0019  | 25              |
| IL-6 vs CD1a                |         | CD1a = 14       |
| WT                          | 0.002   | 15              |
| 16                          | 0.0236  | 21              |
| 110                         | 0.0032  | 18              |
| 116                         | 0.0029  | 23              |
| IL-10 vs CD1a               |         | CD1a = 11       |
| WT                          | 0.6194  | 11              |
| 16                          | 0.1269  | 17              |
| 110                         | 0.9166  | 14              |
| 116                         | 0.3787  | 17              |
| IL-12p70 vs CD1a            |         | CD1a = 15       |
| WT                          | 0.0004  | 15              |
| 16                          | 0.0019  | 21              |
| 110                         | 0.0001  | 18              |
| 116                         | 0.001   | 22              |
| IL-27 vs CD1a               |         | CD1a = 13       |

|                |         |          |
|----------------|---------|----------|
| WT             | 0.0769  | 14       |
| 16             | 0.9641  | 17       |
| 110            | 0.896   | 14       |
| 116            | 0.4646  | 14       |
| IL-13 vs CD1a  |         | CD1a = 9 |
| WT             | 0.821   | 9        |
| 16             | 0.733   | 9        |
| 110            | >0.9999 | 8        |
| 116            | 0.5321  | 8        |
| IL-17f vs CD1a |         | CD1a = 9 |
| WT             | 0.0241  | 9        |
| 16             | 0.9237  | 9        |
| 110            | 0.6424  | 8        |
| 116            | 0.0432  | 8        |

**Supplementary Table 10. Exact P values for Supplementary Figure 12.**

| Comparison                  | P value |
|-----------------------------|---------|
| Fig. S12A Dunnett's vs CD1a |         |
| WT                          | 0.0089  |
| 16                          | 0.0516  |
| 110                         | 0.0218  |
| 116                         | 0.021   |
| Fig. S12B Dunnett's vs CD1a |         |
| WT                          | <0.0001 |
| 16                          | <0.0001 |
| 110                         | 0.0031  |
| 116                         | <0.0001 |
| Fig. S12C Dunnett's vs CD1a |         |
| WT                          | 0.0505  |
| 16                          | 0.4097  |
| 110                         | 0.7309  |
| 116                         | 0.0369  |
| Fig. S12D Dunnett's vs CD1a |         |
| WT                          | 0.0003  |
| 16                          | 0.0055  |
| 110                         | 0.1041  |
| 116                         | 0.0002  |
| Fig. S12E CD4 CD69 vs CD1a  |         |
| WT                          | 0.0029  |
| 16                          | 0.0262  |
| 110                         | 0.3339  |
| 116                         | 0.0004  |
| Fig. S12E CD8 CD69 vs CD1a  |         |
| WT                          | 0.0383  |
| 16                          | 0.0345  |
| 110                         | 0.2527  |
| 116                         | 0.2449  |
| Fig. S12F CD4 CD69 vs CD1a  |         |
| WT                          | 0.0631  |
| 16                          | 0.0778  |
| 110                         | 0.0664  |
| 116                         | 0.0086  |
| Fig. S12F CD8 CD69 vs CD1a  |         |
| WT                          | 0.0996  |
| 16                          | 0.0055  |
| 110                         | 0.3435  |
| 116                         | 0.0282  |
| Fig. S12G Dunnett's vs CD1a |         |
| WT                          | 0.0006  |
| 16                          | 0.0013  |
| 110                         | 0.027   |
| 116                         | 0.0263  |
| Fig. S12H Dunnett's vs CD1a |         |
| WT                          | 0.0002  |
| 16                          | 0.0048  |
| 110                         | 0.0109  |
| 116                         | 0.001   |



**Supplementary Table 11. Exact P values for Supplementary Figure 13.**

| Comparison              | P value |
|-------------------------|---------|
| Fig. S13 GM-CSF vs CD1a |         |
| WT                      | 0.0899  |
| 16                      | 0.8539  |
| 110                     | 0.0792  |
| 116                     | 0.0222  |
| IFN $\beta$ vs CD1a     |         |
| WT                      | 0.0023  |
| 16                      | 0.1391  |
| 110                     | 0.2072  |
| 116                     | 0.0567  |
| IFN $\gamma$ vs CD1a    |         |
| WT                      | <0.0001 |
| 16                      | <0.0001 |
| 110                     | <0.0001 |
| 116                     | <0.0001 |
| IL-1 $\alpha$ vs CD1a   |         |
| WT                      | 0.0273  |
| 16                      | 0.0054  |
| 110                     | 0.0277  |
| 116                     | 0.0307  |
| IL-6 vs CD1a            |         |
| WT                      | 0.0534  |
| 16                      | 0.0843  |
| 110                     | 0.6644  |
| 116                     | 0.3233  |
| IL-12p70 vs CD1a        |         |
| WT                      | 0.8843  |
| 16                      | 0.1909  |
| 110                     | 0.9811  |
| 116                     | 0.9107  |
| TNF $\alpha$ vs CD1a    |         |
| WT                      | 0.0217  |
| 16                      | 0.0983  |
| 110                     | 0.6493  |
| 116                     | 0.0343  |
| IL-17f vs CD1a          |         |
| WT                      | 0.3982  |
| 16                      | 0.1271  |
| 110                     | 0.6295  |
| 116                     | 0.1739  |
| MCP-1 vs CD1a           |         |
| WT                      | 0.0354  |
| 16                      | 0.1717  |
| 110                     | 0.139   |
| 116                     | 0.0163  |
| IL-10 vs CD1a           |         |
| WT                      | 0.2612  |
| 16                      | 0.8945  |
| 110                     | 0.14    |
| 116                     | 0.2147  |
| IL-1 $\beta$ vs CD1a    |         |

|                |         |
|----------------|---------|
| WT             | <0.0001 |
| 16             | <0.0001 |
| 110            | <0.0001 |
| 116            | <0.0001 |
| IL-17a vs CD1a |         |
| WT             | 0.0016  |
| 16             | 0.0042  |
| 110            | 0.0535  |
| 116            | 0.0145  |
| IL-22 vs CD1a  |         |
| WT             | 0.02    |
| 16             | 0.0085  |
| 110            | 0.0226  |
| 116            | 0.006   |
| IL-23 vs CD1a  |         |
| WT             | 0.035   |
| 16             | 0.0226  |
| 110            | 0.2752  |
| 116            | 0.0027  |

**Supplementary Table 12. Exact P values for Supplementary Figure 14.**

| <b>Comparison</b>            | <b>P value</b> |
|------------------------------|----------------|
| Plasma MIP1 $\alpha$ vs CD1a |                |
| WT                           | 0.0236         |
| 16                           | 0.0005         |
| 110                          | 0.0114         |
| 116                          | 0.0048         |
| Plasma MIP1 $\beta$ vs CD1a  |                |
| WT                           | 0.029          |
| 16                           | 0.0068         |
| 110                          | 0.1671         |
| 116                          | 0.1616         |
| Plasma eotaxin vs CD1a       |                |
| WT                           | 0.0236         |
| 16                           | 0.007          |
| 110                          | 0.5488         |
| 116                          | 0.024          |
| Plasma RANTES vs CD1a        |                |
| WT                           | 0.8202         |
| 16                           | 0.5388         |
| 110                          | 0.5942         |
| 116                          | 0.7523         |
| Skin MIP1 $\alpha$ vs CD1a   |                |
| WT                           | <0.0001        |
| 16                           | 0.0024         |
| 110                          | <0.0001        |
| 116                          | 0.0002         |
| Skin MIP1 $\beta$ vs CD1a    |                |
| WT                           | 0.0002         |
| 16                           | 0.0007         |
| 110                          | <0.0001        |
| 116                          | 0.0014         |
| Skin eotaxin vs CD1a         |                |
| WT                           | 0.0564         |
| 16                           | 0.1678         |
| 110                          | 0.2195         |
| 116                          | 0.0176         |
| Skin RANTES vs CD1a          |                |
| WT                           | 0.8162         |
| 16                           | 0.0277         |
| 110                          | 0.6269         |
| 116                          | 0.0438         |

**Supplementary Table 13. Exact P values for Supplementary Figure 15.**

| Comparison              | P value |
|-------------------------|---------|
| Fig. S15 GM-CSF vs CD1a |         |
| WT                      | 0.0473  |
| 16                      | 0.183   |
| 110                     | 0.7844  |
| 116                     | 0.9486  |
| IFN $\beta$ vs CD1a     |         |
| WT                      | 0.9597  |
| 16                      | 0.9825  |
| 110                     | 0.9298  |
| 116                     | 0.5498  |
| IFN $\gamma$ vs CD1a    |         |
| WT                      | 0.0039  |
| 16                      | 0.1322  |
| 110                     | 0.101   |
| 116                     | 0.0352  |
| IL-1 $\alpha$ vs CD1a   |         |
| WT                      | 0.0018  |
| 16                      | 0.0007  |
| 110                     | 0.0026  |
| 116                     | 0.002   |
| IL-1 $\beta$ vs CD1a    |         |
| WT                      | 0.055   |
| 16                      | 0.0309  |
| 110                     | 0.951   |
| 116                     | 0.4231  |
| IL-10 vs CD1a           |         |
| WT                      | 0.0045  |
| 16                      | 0.0003  |
| 110                     | 0.0711  |
| 116                     | 0.0009  |
| IL-12p70 vs CD1a        |         |
| WT                      | 0.0475  |
| 16                      | 0.9029  |
| 110                     | 0.999   |
| 116                     | 0.1263  |
| IL-6 vs CD1a            |         |
| WT                      | 0.3618  |
| 16                      | 0.1055  |
| 110                     | 0.6067  |
| 116                     | 0.2358  |
| TNF $\alpha$ vs CD1a    |         |
| WT                      | <0.0001 |
| 16                      | <0.0001 |
| 110                     | <0.0001 |
| 116                     | <0.0001 |
| IL-17a vs CD1a          |         |
| WT                      | 0.3042  |
| 16                      | 0.0078  |
| 110                     | 0.7139  |
| 116                     | 0.0051  |
| IL-17f vs CD1a          |         |

|               |        |
|---------------|--------|
| WT            | 0.9998 |
| 16            | 0.8254 |
| 110           | 0.9961 |
| 116           | 0.9781 |
| IL-22 vs CD1a |        |
| WT            | 0.2344 |
| 16            | 0.0793 |
| 110           | 0.1691 |
| 116           | 0.0063 |
| IL-23 vs CD1a |        |
| WT            | 0.0168 |
| 16            | 0.7908 |
| 110           | 0.5879 |
| 116           | 0.0068 |
| MCP-1 vs CD1a |        |
| WT            | 0.0418 |
| 16            | 0.3711 |
| 110           | 0.6372 |
| 116           | 0.1273 |

**Supplementary table 14. Genotyping PCR reaction**

|                           |                            |
|---------------------------|----------------------------|
| DNA template              | 1ul                        |
| MyTaqRed Mix (BioLine) 2x | 25ul                       |
| CD1a forward primer       | 0.4μM                      |
| CD1a reverse primer       | 0.4μM                      |
| dd-H2O                    | Up to 50ul reaction volume |

**Supplementary table 15. Genotyping PCR thermocycler programme**

|                         |              |
|-------------------------|--------------|
| 1. Initial denaturation | 95°C, 2 min  |
| Cycle: Steps 2-4        | X34          |
| 2. Denaturation         | 95°C, 20 sec |
| 3. Annealing            | 60°C, 15 sec |
| 4. Extension            | 72°C, 20 sec |
| 5. Final extension      | 72°C, 2 mins |
| 6. Hold                 | 4°C          |
